# Supplementary material
Source: MDPI journal article supplement (https://www.mdpi.com/2673-8007/2/2/26)
Supplement: s1 [file s1]

**Supplementary Table S1. Potable sample statistical analysis.** A two-tailed t-test was done to compare colony counts of each culture method. The p-values are shown and the method that performed significantly better is listed in the “Favors” column.

| Sample | MYChrOme vs. NTM Elite |           | NTM Elite vs. 7H11S |           | MYChrOme vs. 7H11S |          |
|--------|------------------------|-----------|---------------------|-----------|--------------------|----------|
|        | (p-value)              | Favors    | (p-value)           | Favors    | (p-value)          | Favors   |
| 1      | ND                     | NS        | ND                  | NS        | ND                 | NS       |
| 2      | 0.888                  | NS        | 0.039*              | NTM Elite | 0.026*             | MYChrOme |
| 3      | 0.028*                 | MYChrOme  | 1.000               | NS        | 0.030*             | MYChrOme |
| 4      | TNTC                   | NS        | TNTC                | NS        | TNTC               | NS       |
| 5      | 0.506                  | NS        | 0.075               | NS        | 0.062              | NS       |
| 6      | ND                     | NS        | ND                  | NS        | ND                 | NS       |
| 7      | 0.046*                 | NTM Elite | 0.045*              | 7H11      | 0.006**            | 7H11     |
| 8      | ND                     | NS        | ND                  | NS        | ND                 | NS       |
| 9      | ND                     | NS        | 0.423               | NS        | 0.423              | NS       |
| 10     | 0.560                  | NS        | 0.038*              | NTM Elite | 0.266              | NS       |
| 11     | 0.815                  | NS        | 0.014*              | NTM Elite | 0.020*             | MYChrOme |
| 12     | 0.142                  | NS        | 0.086               | NS        | 0.118              | NS       |
| 13     | 0.114                  | NS        | 0.206               | NS        | 0.163              | NS       |
| 14     | 0.010**                | MYChrOme  | 0.581               | NS        | 0.007**            | MYChrOme |
| 15     | ND                     | NS        | 0.423               | NS        | 0.423              | NS       |
| 16     | 0.149                  | NS        | ND                  | NS        | 0.149              | NS       |
| 17     | ND                     | NS        | ND                  | NS        | ND                 | NS       |
| 18     | 0.471                  | NS        | 0.130               | NS        | 0.214              | NS       |
| 19     | 0.594                  | NS        | 0.869               | NS        | 0.338              | NS       |
| 20     | 0.018*                 | MYChrOme  | 0.038*              | NTM Elite | 0.009**            | MYChrOme |
| 21     | 0.173                  | NS        | 0.002**             | NTM Elite | 0.011*             | MYChrOme |
| 22     | 0.545                  | NS        | 0.013*              | NTM Elite | 0.024*             | MYChrOme |
| 23     | ND                     | NS        | ND                  | NS        | ND                 | NS       |
| 24     | 0.003**                | MYChrOme  | 0.128               | NS        | 0.009**            | MYChrOme |
| 25     | 0.649                  | NS        | 0.225               | NS        | 0.184              | NS       |

\*p ≤0.05

\*\*p ≤0.01

NS: Not significant

ND: Not detected by either method

**Supplementary Table S2. Non-potable sample statistical analysis.** A two-tailed t-test was done to compare colony counts of each culture method. The p-values are shown and the method that performed significantly better is listed in the “Favors” column.

| Sample | MYChrOme vs. NTM Elite |           | NTM Elite vs. 7H11S |           | MYChrOme vs. 7H11S |          |
|--------|------------------------|-----------|---------------------|-----------|--------------------|----------|
|        | (p-value)              | Favors    | (p-value)           | Favors    | (p-value)          | Favors   |
| 1      | ND                     | NS        | ND                  | NS        | ND                 | NS       |
| 2      | 0.349                  | NS        | 0.947               | NS        | 0.289              | NS       |
| 3      | 0.744                  | NS        | 0.080               | NS        | 0.271              | NS       |
| 4      | 0.098                  | NS        | 0.721               | NS        | 0.014*             | 7H11     |
| 5      | 0.423                  | NS        | 0.463               | NS        | 0.057              | NS       |
| 6      | 0.082                  | NS        | 0.074               | NS        | 0.423              | NS       |
| 7      | 0.000***               | MYChrOme  | 0.038*              | 7H11      | 0.002              | MC       |
| 8      | 0.225                  | NS        | 0.198               | NS        | 0.093              | NS       |
| 9      | 0.423                  | NS        | 0.406               | NS        | 0.016*             | 7H11     |
| 10     | ND                     | NS        | 0.423               | NS        | 0.423              | NS       |
| 11     | ND                     | NS        | 0.184               | NS        | 0.184              | NS       |
| 12     | 0.685                  | NS        | 0.256               | NS        | 0.217              | NS       |
| 13     | 0.661                  | NS        | 0.294               | NS        | 0.861              | NS       |
| 14     | 0.423                  | NS        | 0.038*              | 7H11      | 0.435              | NS       |
| 15     | 0.423                  | NS        | 0.558               | NS        | 0.184              | NS       |
| 16     | 0.022*                 | MYChrOme  | 0.136               | NS        | 0.023*             | MYChrOme |
| 17     | 0.387                  | NS        | 0.465               | NS        | 0.697              | NS       |
| 18     | 0.042*                 | NTM Elite | 0.084               | NS        | 0.448              | NS       |
| 19     | 0.016*                 | NTM Elite | 0.018*              | NTM Elite | 0.282              | NS       |
| 20     | ND                     | NS        | ND                  | NS        | ND                 | NS       |
| 21     | ND                     | NS        | 0.225               | NS        | 0.225              | NS       |
| 22     | ND                     | NS        | 0.423               | NS        | 0.423              | NS       |
| 23     | 0.270                  | NS        | 0.639               | NS        | 0.055              | NS       |
| 24     | ND                     | NS        | 0.184               | NS        | 0.184              | NS       |
| 25     | ND                     | NS        | 0.085               | NS        | 0.085              | NS       |

\*p ≤0.05

\*\*p ≤0.01

\*\*\*p ≤0.001

NS: Not significant

ND: Not detected by either method
